# Supplementary material for: AuNP array coated substrate for sensitive and homogeneous SERS-immunoassay detection of human immunoglobulin G
Source: Royal Society of Chemistry journal article supplement (doi:10.1039/d1ra02404c), 2021-01-01
Supplement: d1ra02404c1.pdf [file d1ra02404c1.pdf]

## Supporting Information

# AuNP array coated substrate for the sensitive and homogeneous SERS-immunoassay detection of human Immunoglobulin G

Qi Qu, ‡<sup>a</sup> Jing Wang, ‡<sup>a</sup> Chuan Zeng,<sup>d</sup> Mengfan Wang,<sup>\*ac</sup> Wei Qi,<sup>abc</sup> Zhimin He<sup>a</sup>

<sup>a</sup> School of Chemical Engineering and Technology, State Key Laboratory of Chemical Engineering, Tianjin University, Tianjin 300350, P. R. China.

E-mail: mwan@tju.edu.cn

<sup>b</sup> The Co-Innovation Centre of Chemistry and Chemical Engineering of Tianjin, Tianjin 300072, P. R. China.

<sup>c</sup> Tianjin Key Laboratory of Membrane Science and Desalination Technology, Tianjin 300350, P. R. China.

<sup>d</sup> Technical Center of Zhuhai Entry-Exit Inspection and Quarantine Bureau, Zhuhai, P. R. China

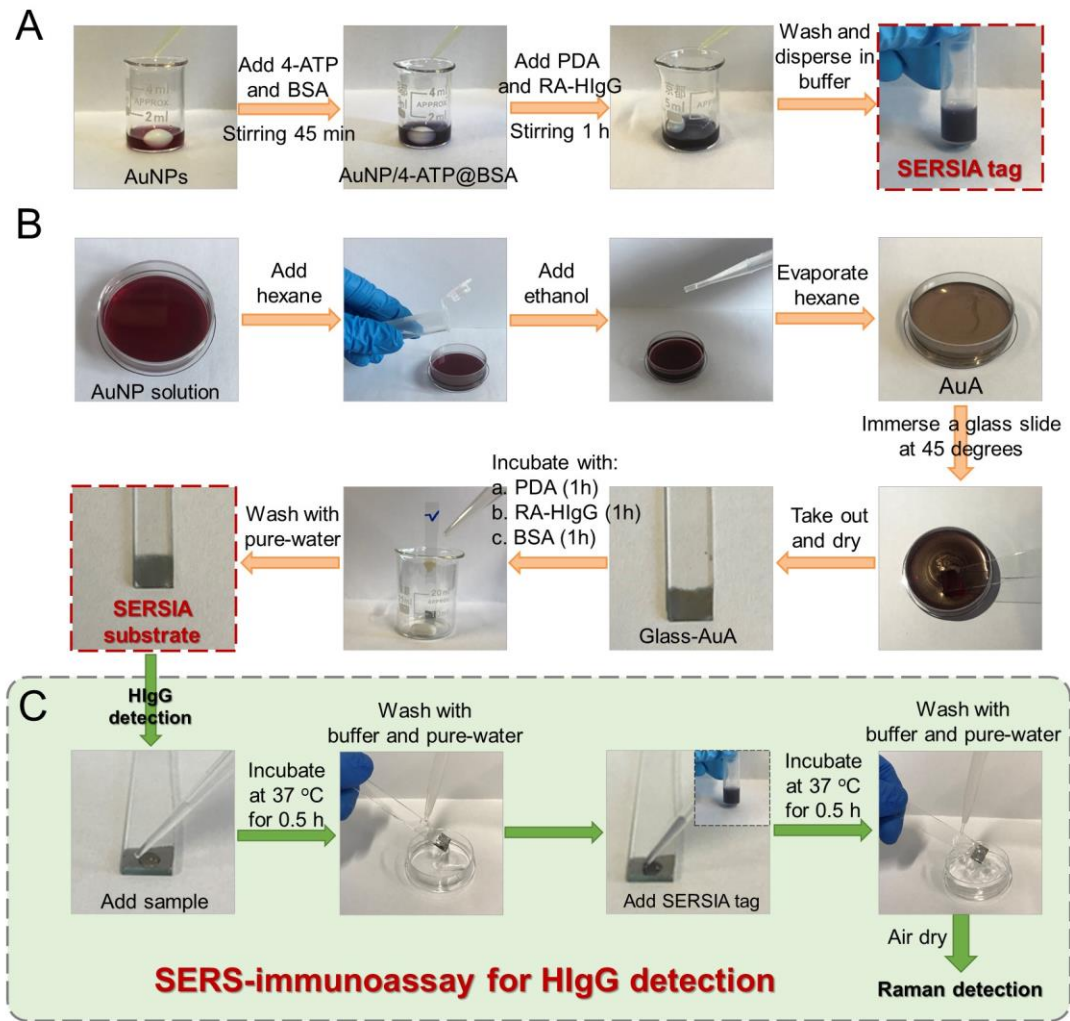

**Fig. S1** The fabrication of SERSIA tag (A) and SERSIA substrate (B). The SERS-immunoassay process for the detection of HlgG (C).

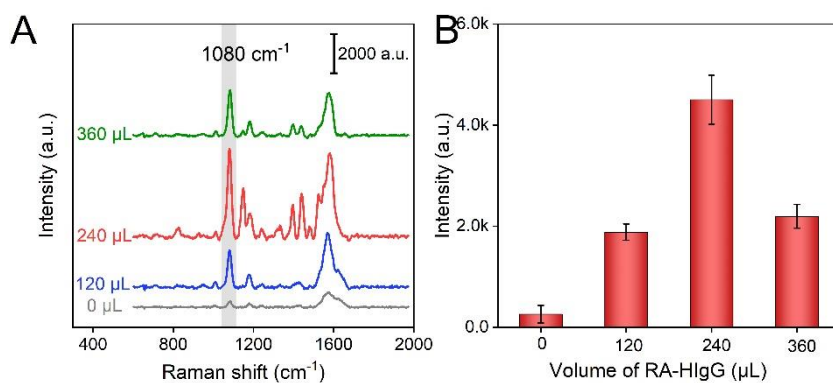

**Fig. S2.** Optimization of the amount of RA-HIgG modified on the SERSIA substrate. (A) The Raman spectra detected on the SERSIA substrates modified by different amount of RA-HIgG. (B) The corresponding peak intensities at 1080 cm<sup>-1</sup>.

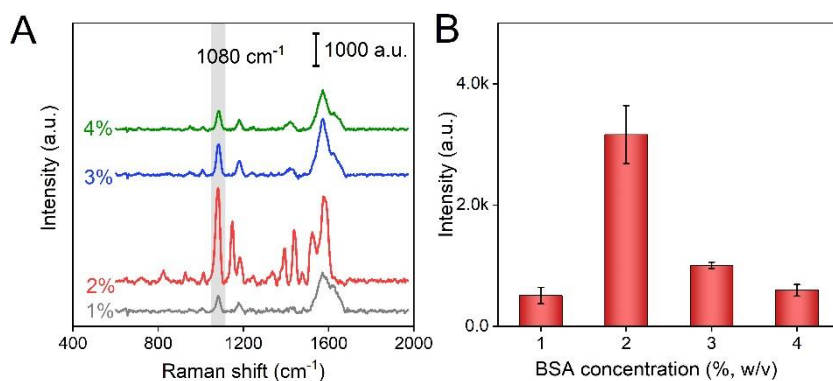

**Fig. S3.** Optimization of the amount of BSA modified on the SERSIA substrate. (A) The Raman spectra detected on the SERSIA substrates modified by different concentration of BSA. (B) The corresponding peak intensities at 1080 cm<sup>-1</sup>.

**Table S1.** comparison of the practical detection ability with reference

| <b>Method</b>               | <b>Sample</b>       | <b>Analyte</b> | <b>Recovery (%)</b> | <b>RSD (%)</b> | <b>Ref.</b> |
|-----------------------------|---------------------|----------------|---------------------|----------------|-------------|
| PLISA                       | Human serum         | HIgG           | 97.2-102.2          | 2.36-2.88      | 1           |
| FLISA                       | Human serum         | HIgG           | 98.7-105            | 2.32-2.86      | 2           |
| DNAzyme-Based ELISA         | cellular homogenate | HIgG           | 99-104              | 3.4-16         | 3           |
| Plasmonic ELISA             | fetal Bovine Serum  | HIgG           | 83.3-103.8          | 5.5-13.8       | 4           |
| FLISA                       | Human serum         | HIgG           | 90-106.6            | 2.6-10.5       | 5           |
| electrochemical immunoassay | Human serum         | HIgG           | 91.3-109            | 3.3-5.9        | 6           |
| SERS-immunoassay            | Human serum         | HIgG           | 103.6-105.3         | 4.55-4.66      | this work   |

## References

1. T. Xia, Q. Ma, Y. Li, X. Yan and X. Su, *New Journal of Chemistry*, 2016, **40**, 6860-6866.
2. H. Tao, X. Liao, M. Xu, X. Xie, F. Zhong and Z. Yi, *Analytical Methods*, 2014, **6**, 2560.
3. R. Hu, T. Liu, X. B. Zhang, Y. Yang, T. Chen, C. Wu, Y. Liu, G. Zhu, S. Huan, T. Fu and W. Tan, *Anal Chem*, 2015, **87**, 7746-7753.
4. Z. Zhang, Z. Chen, S. Wang, F. Cheng and L. Chen, *ACS Appl Mater Interfaces*, 2015, **7**, 27639-27645.
5. J. Guo, Y. Wang, S. Niu, H. Li, Y. Tian, S. Yu, F. Yu, Y. Wu and L. E. Liu, *ACS Omega*, 2020, **5**, 23229-23236.
6. H. Zhang, D. Ning and J. Zheng, *RSC Advances*, 2015, **5**, 106607-106612.
